# Supplementary material
Source: publisher site journal article supplement (https://oneecosystem.pensoft.net/article/download/suppl/7537501/)
Supplement: Supplementary file 1

## Questionnaire to assess

### Use and Appreciation of Urban Green in Potsdam-Drewitz, August 2020

#### Use of urban green

1) Which green spaces in Drewitz do you visit regularly?\*

Court yards  Konrad-Wolf-Park  Private gardens in court yards  "Wendescheife"  
(community garden)  Priesterweg  Other green spaces  No answer

2) How has your usage of greenspaces changed since the lockdown in 2020 due to Covid-19?

I use greenspaces

A lot more  More  Equally  Less  A lot less  No answer

3) Which activities do you use the greenspaces for?\*

walking  dog walking  sitting,relaxing, reading  experiencing nature  as a meeting point  
with family/friends  artistic use  passing through  games and exercise  eating and drinking  
 gardening  to cool down  other activities  no answer

4) On a scale from 1 (very happy) to 6 (very unhappy), how content are you with...

a. the quantity of urban green in the neighbourhood?

b. the physical appearance (management) of urban green in the neighbourhood?

5) What would you like to change about the greenspaces in Drewitz, if anything?

#### Appreciation of urban green

6) Urban green provides a variety of benefits for us humans. On a scale from 1 (not important) to 5 (very important), please indicate how important the following benefits provided by urban greenspaces in Drewitz are for you personally.

Urban greenspaces

- increase physical well-being (human health) (e.g. they provide fresh air, shadow, they reduce air temperatures, they provide space for physical exercise)
- increase climate protection (e.g. by storing carbon in trees)
- increase biodiversity (e.g. by providing habitats for plants and animals)
- provide an area to enhance social cohesion (e.g. as a venue for social gatherings, for collective gardening)

7) Please weight the same list of benefits to reflect your personal importance by allocating a total of 100 points between them

Urban greenspaces

- increase physical well-being (human health) (e.g. they provide fresh air, shadow, they reduce air temperatures, they provide space for physical exercise)
- increase climate protection (e.g. by storing carbon in trees)
- increase biodiversity (e.g. by providing habitats for plants and animals)
- provide an area to enhance social cohesion (e.g. as a venue for social gatherings, for collective gardening)

8) Has your appreciation of urban green changed since the lockdown in 2020? Your appreciation for urban green is now  higher  same  lower  no answer

Why?

### Thermal perception

>> record daily maximum temperature on every survey day –this section was excluded in the online version of the survey<<

9) How are you feeling today?

Cold  Cool  Slightly cool  Neutral  Slightly warm  Warm  Hot  No Answer

10) How do you perceive today's climate thermally?

Comfortable  Slightly uncomfortable  Uncomfortable  Very uncomfortable  No answer

How would you prefer it to be right now?

Cooler  No change  Warmer  No answer

### Socio-demographic information

11) Please indicate your general information

Age

< 20  20 - 29  30 - 39  40 - 49  50 - 59  60 - 69  70 - 79  80 - 89  90+

Gender

Male  Female  Diverse  No answer

Place of residence

Drewitz  Potsdam  Elsewhere  No answer
